# Supplementary material
Source: PubMed Central journal article supplement (PMC3021444)
Supplement: supp_jn.110.132506_nut132506_T01.pdf [file supp_jn.110.132506_nut132506_T01.pdf]

## Online Supporting Material

SUPPLEMENTAL TABLE 1. Conditional logistic regression models of the relation of *SHMT1* rs1979277 (1420 C→T) and *MTHFR* rs1801133 (677 C→T) genotypes to CHD risk, Nurses' Health Study (NHS), 1990-1998, and Health Professionals Follow-up Study (HPFS), 1994-2000.

| Variables                                               | NHS <sup>2,3</sup> |      |      | HPFS <sup>4</sup> |      |      |
|---------------------------------------------------------|--------------------|------|------|-------------------|------|------|
|                                                         | $\beta$            | SE   | P    | $\beta$           | SE   | P    |
| <i>SHMT1</i> 1420 C→T (TT vs. CC/CT)                    | -0.98              | 0.56 | 0.08 | -0.40             | 0.47 | 0.39 |
| <i>MTHFR</i> 677 C→T (CT vs. CC)                        | 0.17               | 0.18 | 0.35 | 0.005             | 0.17 | 0.98 |
| <i>MTHFR</i> 677 C→T (TT vs. CC)                        | 0.22               | 0.29 | 0.44 | -0.39             | 0.30 | 0.19 |
| Interaction between <i>SHMT1</i> TT and <i>MTHFR</i> CT | 1.30               | 0.69 | 0.06 | -0.77             | 0.69 | 0.26 |
| Interaction between <i>SHMT1</i> TT and <i>MTHFR</i> TT | N/A                | N/A  | N/A  | 0.014             | 0.83 | 0.99 |

<sup>1</sup> values from conditional logistic regression models are  $\beta$ , beta-coefficient; SE, standard error; and P, P value.

<sup>2</sup>n=652 cases and controls, unadjusted model.

<sup>3</sup>Due to lack of double homozygous variants in cases, the second interaction term could not be estimated.

<sup>4</sup>n=719 cases and controls, unadjusted model.
